# Supplementary material for: Design and evolution of the BMS process greenness scorecard
Source: Royal Society of Chemistry journal article supplement (doi:10.1039/c7gc02190a), 2017-01-01
Supplement: c7gc02190a2.xlsx [file c7gc02190a2.xlsx]

## Sheet: Version History
Process Greenness Scorecard History
Release Version	Issued Date	Changes
1	2017-07-19	First Release Version

## Sheet: Instructions
	Process Scorecard Instructions
	Overview
	The process scorecard is designed to facilitate the generation of the process greenness score for a given process.
	This workbook is divided into the following worksheets:
	Input Sheets (Green Tabs):
	1. Input - This sheet is used to capture process information. See below for more details on entering a process
	2. Hazardous Reagents - This sheet is used to capture the hazardous reagents used within each step
	Output Sheets:
	1. Greenness Score Card - contains overall and step greenness score card
	2. Overall Greenness Calcs - contains values used in generating the overall process greenness score card values
	Calculation Sheets (Red Tabs) - Maybe hidden once configured
	1. Drop Down List - Populates drop down menus found in the input sheet. For each Menu item, there is a field for the Item, Associated score (if applicable), and display text for the item
	2. Step Calcs- performs calcualtions for the scorecard
	Filling in the Input Sheet
	Below is an explanation of each field in the input sheet. A step is defined as from an isolated product to the next isolated product. All values do not need to be filled in. If you do not have the information for a value, simply leave the cell blank (via delete
	or backspace) as a value of 0 will be used in the calculation. No other information is required to calculate values for a single workbook.
	Any field that contains a drop down menu is colored yellow on the input sheet.
	Field	Description
	Time Point in Development:	Enter point in development here. This value is used in header information and not used in any calculation
	Location:	Enter whether this step will be run in house or outsourced. This value is not used in any calculation
	Product Name:	Enter step product name here - put all product names in first
	MW starting material	Enter molecular weight of the step starting material (limiting reagent)
	MW product	Enter molecular weight of the step product
	Next Step:	Choose the step that uses this step product as an input, for the final step select "Last Step" to indicate no further steps
	Equivalents in next Step	Enter the equivalents of the step product used in the next step
#	Input
1	Solvent(s) Used	Enter the kg/kg input for each category that is used within the step, for aqueous solutions include aqueous acids and bases here, for concentrated solutions ≥ 12 M include in the reagent section below. When acids or bases are used as solvents record here, when used as reagents record as reagent below.
	Enter the total of the input charges for starting material and reagents	Add the total reagents needed for a 1 kg reaction (input) and also add 1 kg of the starting material. If two starting materials are used, use the limiting reagent as sm and the other as reagent. These values can all be taken from the actual amounts in the Symyx notebook material table or from a PFD.
2	Solvent Recovery Percentage	Enter the theoretical or actual amount of solvent that could be recovered.
3	Process Hazardous Waste (Liquid) kg/kg input	Only input if you need to correct the value to account for non-hazardous waste, otherwise, score assumes all waste is disposed of as hazardous waste.
	Process Non-Hazardous Waste (Liquid) kg/kg input	Enter if aqueous waste is considered non-hazardous (treated and disposed ie manufacturing or enzymatic transformation)
4	Solid Process Waste kg/kg output	Enter for solid wastes that must be disposed of, for example: solid by-products, silica, celite, carbon, carbon pads, resin, silicycle metal scavengers, note: standard cuno polish filtration is not counted
5	Number of Unique Solvents Used	Number of Unique Solvents for the step
6	Gaseous/Highly Volatile Byproducts/Excess Reagent Gases	If a process contains off-gassing, choose the off-gassed product from the drop down menu. If more then one chemical is off-gassed, choose the chemical with the lowest numerical value.
7	Chemical Transformations	Enter the number of chemical transformations within a step (a step equals from an isolated intermediate to the next isolation so a 4 reaction telescope is 1 step with 4 transformations). If 2 ester groups are hydrolyzed on a molecule, this is 2 transformations. Formation of an activated intermediate does not count as a chemical transformation unless that intermediate is isolated.
8	Number of Isolations	Enter the number of isolations within a step (For example crystallization and required recrystallization equals 2, also isolation of a free form and conversion to a salt is one transformation with 2 isolations)
9	Step Yield (Molar %)	Enter the molar yield of the step
10	Number of Hazardous Reagents Used	No value is input here. Instead, go to the Hazardous reagent sheet, and place a 1 by any listed hazardous reagent used in the step.
11	Dust Explosion Potential	If dust explosion data is available, fill in the following fields:
	Charge Dissipation	Choose the range from the drop down menu
	Pressure rise rate (bar/sec)	Choose the range from the drop down menu (note MSDS may report mbar/sec)
	Minimum Ignition Energy (millijoules)	Choose the range from the drop down menu
	Kst Explosion Energy value (ST)	Choose the range from the drop down menu
12	Process Hazards	Choose the process hazard description that most suits the step from the dropdown menu
13	Environmental Issues/Biopersistent Materials	Choose the lowest numbered compound that is used in step from the dropdown menu
14	Worker Exposure Issues (Occupational Exposure Bands)	Choose the lowest expsure control band for all the compounds used in the step from the dropdown menu
15	PMI Info
	Yield (mol%) (from Greenness #9)	No input is needed. If you are not entering process greenness information, you can enter a number here
	Kg Reagents / Kg Product	Enter the kg/kg output for each category that is used within the step
	Kg Organic solvents / Kg Product
	Kg Aqueous solvents / Kg Product

## Sheet: Input
		Process Scorecard																		Process Scorecard
		Time Point in Development:														Prepared by:				Time Point in Development:				0														Prepared by:		0
		Project Name:														Date:				Project Name:				0														Date:		00:00:00
		Project No:														Version:				Project No:				0														Version:		0
	Location:	Out Sourced		In House		In House		In House		In House		In House		In House		In House		In House		In House		In House		In House		In House	In House	In House		In House		In House		In House		In House		In House		In House
		Step-1		Step-2		Step-3		Step-4		Step-5		Step-6		Step-7		Step-8		Step-9		Step-10		Step-11		Step-12		Step-13		Step-14		Step-15		Step-16		Step-17		Step-18		Step-19		Step-20
	Product Name:	Compound 1		Compound 2		Compound 3
	Input MW	400		749.4		599.5
	Output MW	749.4		599.5		549.9
	Next Step	Compound 2		Compound 3		Last Step
	Equivalents in next Step	1		1		1
Process Greenness																																										Typical
1	Charges																																									Range
	Enter the kg of the solvent from each class / kg input
	Water, Aqueous Solutions (<12 M)	3				35																																				1-100
	Acetone, tert-Amyl methyl ether (TAME), Anisole, 1-Butanol, tert-Butanol, n-Butyl acetate, Dimethyl carbonate, Ethanol, Ethyl acetate, Ethylene glycol, Isoamyl alcohol, Isobutanol, Isobutyl acetate, Isopropanol, Isopropyl acetate, Methanol, Methyl ethyl ketone, Methyl isobutyl ketone	1																																								1-100
	Acetic acid, Acetic anhydride, Acetonitrile, Benzyl alcohol, Chlorobenzene, Cyclohexane, Cyclohexanone, CPME, DMPU, DMSO, Formic acid, n-Heptane, Methyl acetate, Methylcyclohexane, 2-MeTHF, 1,3-Propanediol, Propylene carbonate, THF, Toluene, Xylenes	38		1		35																																				1-100
	MTBE, DCM, Diisopropyl ether, DME, DMAc, DMF, 1,4-Dioxane, n-Hexane, n-Pentane, 2-Methoxyethanol, NMP, Pyridine, Sulfolane, Triethylamine	10		50		13																																				1-100
	Benzene, Carbon tetrachloride, Chloroform, DCE, Diethyl ether, HMPA, Nitromethane																																									1-100
	Reagents needed for a 1 kg (sm) reaction (include 1 kg starting material) ie (1 kg of sm + 0.521 kg NaOH + 0.374 kg TBABr = 1.895 kg)	5		2		2
2	Solvent Recovery Percentage	0		0		0																																				0-100
3	Process Hazardous Waste (Liquid) kg/kg input (only input to correct for non-hazardous waste)																																									0-500
	Process Non-Hazardous Waste (Liquid) kg/kg input
4	Solid Process Waste kg/kg input	0		0		0																																				0-50
5	Number of Unique Solvents Used	1		4		1																																				0-10
6	Gaseous/Highly Volatile Byproducts/Excess Reagent Gases - Choose lowest number item from drop down menu	4 - None		3 - Ethylene		4 - None
7	Chemical Transformations	2		1		4																																				0-20
8	Number of Isolations	1		1		2																																				0-10
9	Step Yield (Molar %)	0.85		0.85		0.75																																				0-500
10	Number of Hazardous Reagents Used							Enter Values on Hazardous Reagent Work Sheet
11	Dust Explosion Potential - Chose from drop down menu							Calculated from Values Below
	Charge Dissipation	1 millisec to 1 sec		1 sec to 1 min		1 min to 5 min
	Pressure rise rate (bar/sec)	200 to 500 bar/sec		> 500 bar/sec		50 to 200 bar/sec																																				0-1000
	Minimum Ignition Energy (millijoules)	<10 millijoules		>500 millijoules		<10 millijoules																																				0-1000
	Kst Explosion Energy value (ST)	<200 (St 1)		201-300 (St 2)		201-300 (St 2)																																				0-1000
12	Process Hazards - Choose from drop down menu	Inherently Safe Process (≤10 °C T adiabatic, no gas generation)		Moderate heat (>10 °C to ≤50 °C T adiabatic) OR gas generation-easy to manage.		Inherently Safe Process (≤10 °C T adiabatic, no gas generation)
13	Environmental Issues/Biopersistent Materials - Choose Lowest number item from drop down menu	4 - Calcium		4 - Magnesium		4 - None
14	Worker Exposure Issues (Occupational Exposure Bands)	≥ 100 ug/m3		0.1-1 ug/m3		0.1-1 ug/m3
15	Charges (from greeness scorecard, only change to correct value)
	Yield (mol%)	0.85		0.85		0.75
	Kg Reagents / Kg Product	2.51181		1.47064		1.4536
	Kg Organic solvents / Kg Product	30.7697		75.0025		69.7727
	Kg Aqueous solvents / Kg Product	1.88386				50.8759

## Sheet: Hazardous Reagents
	Step
Put a '1' to the right of each hazardous reagent. You need to manually put the score the correcponds to these totals on the sheets for each step.	Compound 1		Compound 2		Compound 3
Hazardous Reagents	1		0		0		0		0		0		0		0		0		0		0		0		0		0		0		0		0		0		0		0
Acetaldehyde
Acetone cyanohydrin
Acetone thiosemicarbazide
Acetylene
Acrolein (2-Propenal)
Acrylamide
Acrylonitrile (2-Propenenitrile)
Acrylyl Chloride (2-Propenoyl chloride)
Adiponitrile
Aldicarb
Aldrin
Allyl alcohol (2-Propen-1-ol)
Allyl Chloride
Allylamine (2-Propen-1-amine)
Alkylaluminums
Aluminum phosphide
Aminopterin
Amiton
Amiton oxalate
Ammonia
Ammonia, Anhydrous
Ammonia solutions (20% or greater)
Ammonium Perchlorate
Ammonium Permanganate
Amphetamine
Aniline
Aniline, 2,4,6-trimethyl-
Antimony pentafluoride
Antimycin A
ANTU
Arsenic pentoxide
Arsenous oxide
Arsenous trichloride
Arsine (also called Arsenic Hydride)
Azinphos-ethyl
Azinphos-methyl
Benzenamine, 3-(trifluoromethyl)-
Benzene, 1-(chloromethyl)-4-nitro-
Benzenearsonic acid
Benzimidazole, 4,5-dichloro-2-(trifluoromethyl)-
Benzotrichloride
Benzyl chloride
Benzyl cyanide
beta-Propiolactone
Bicyclo(2.2.1)heptane-2-carbonitrile,5-chloro-6-((((methylamino)carbonyl)oxy)imino)-,(1-alpha,2-beta,4-alpha,5-alpha,6E))-
Bis (Chloromethyl) Ether
Bis (chloromethyl) ketone
Bitoscanate
Boron Trichloride (Borane, trichloro-)
Boron Trifluoride (Borane, trifluoro-)
Boron trifluoride compound with methyl ether (1:1)
Bromadiolone
Bromine
Bromine Chloride
Bromine Pentafluoride
Bromine Trifluoride
3-Bromopropyne (also called Propargyl Bromide)
Bromotrifluorethylene
1,3-Butadiene
Butane
1-Butene
2-Butene
Butene
2-Butene-cis
2-Butene-trans
Butyl Hydroperoxide (Tertiary)
Butyl Perbenzoate (Tertiary)
Cadmium stearate
Cadmium oxide
Calcium arsenate
Camphechlor
Cantharidin
Carbachol chloride
Carbamic acid, methyl-, O-((2,4-dimethyl-1,3-dithiolan-2-yl)methylene)amino)-
Carbofuran
Carbonyl Chloride (see Phosgene)
Carbon disulfide
Carbon oxysulfide
Carbophenothion
Carbonyl Fluoride
Cellulose Nitrate
Chlordane
Chlorfenvinfos
Chlorine
Chlorine Dioxide (Chlorine oxide (ClO2)
Chlorine monoxide
Chlorine Pentrafluoride
Chlorine Trifluoride
Chlormephos
Chlormequat chloride
Chloroacetic acid
Chlorothanol
Chlorodiethylaluminum
(also called Diethylaluminum Chloride)
Chloroethyl chloroformate
1-Chloro-2,4-Dinitrobenzene
Chloroform (Methane, trichloro-)
Chloromethyl Methyl Ether (Methane, chloromethoxy-)
Chloromethyl ether
Chlorophacinone
Chloropicrin
Chloropicrin and Methyl Bromide mixture
Chloropicrin and Methyl Chloride mixture
2-Chloropropylene
2-Chloropropylene
Chloroxuron
Chlorthiophos
Chromic chloride
Cobalt carbonyl
Cobalt, ((2,2'-(1,2-ethanediylbis(nitrilomethylidyne))bis(6-fluorophenylato))(2)-N,N',O,O')-
Colchicine
Commune Hydroperoxide
Coumaphos
Coumatetralyl
Crimidine
Crotonaldehyde (2-Butenal, (E)-)
Crontonaldehyde, (E)- (2-Butenal, (E)-)
Cyanogen
Cyanogen bromide
Cyanogen Chloride
Cyanogen iodide
Cyanophos
Cyanuric Fluoride
Cycloheximide
Cyclohexylamine (Cyclohexanamine)
Cyclopropane
Decaborane(14)
Demeton
Demeton-S-methyl
Diacetyl Peroxide
Dialifor
Diazomethane
Dibenzoyl Peroxide
Diborane
Dibutyl Peroxide (Tertiary)
Dichloro Acetylene
Dichloroethyl ether
Dichloromethylphenylsilane
Dichlorosilane
Dichlorvos
Dicrotophos
Diepoxybutane
Diethyl chlorophosphate
Diethylzinc
Difluoroethane
Digitoxin
Diglycidyl ether
Digoxin
Diisopropyl Peroxydicarbonate
Dilauroyl Peroxide
Dimefox
Dimethoate
Dimethylamine, Anhydrous
Dimethyldichlorosilane (Silane, dichlorodimethyl-)
Dimethylhydrazine, 1,1- (Hydrazine, 1,1-dimethyl-)
Dimethylamine, Anhydrous
Dimethyl phosphorochloridothioate
Dimethyl-p-phenylenediamine
Dimethyldichlorosilane
Dimethylhydrazine
Dimetilan
2,2-Dimethylpropane
Dimethyl sulfate
2,4-Dinitroaniline
Dinitrocresol
Dinoseb
Dinoterb
Dioxathion
Diphacinone
Diphosphoramide, oxtamethyl-
Disulfoton
Dithiazanine iodide
Dithiobiuret
Emetine, dihydrochloride
Endosulfan
Endothion
Endrin
Epichlorohydrin (Oxirane, (chloromethyl)-)
EPN
Ergocalciferol
Ergotamine tartrate
Ethane
Ethanesulfonyl chloride, 2-chloro-
Ethanol, 1,2-dichloro-, acetate
Ethion
Ethoprophos
Ethyl acetylene
Ethylamine
Ethylbis(2-chloroethyl)amine
Ethyl chloride
Ethyl ether
Ethyl mercaptan
Ethyl Methyl Ketone Peroxide
(also Methyl Ethyl Ketone Peroxide;
concentration greater than 60%)
Ethyl Nitrite
Ethylamine
Ethylene
Ethylene Fluorohydrin
Ethylene Oxide (Oxirane)
Ethylenediamine (1,2-Ethanediamine)
Ethyleneimine (Aziridine)
Ethylthiocyanate
Fenamiphos
Fensulfothion
Fluenetil
Fluorine
Fluoroacetamide
Fluoroacetic acid
Flyoroacetyl chloride
Fluorouracil
Fonofos
Formaldehyde cyanohydrin
Formaldehyde (Formalin)
Formetanate hydrochloride
Formothion
Formparanate
Fosthietan
Fuberidazole
Furan
Gallium trichloride
Hexachlorocyclopentadiene
Hexafluoroacetone
Hexamethylenediamine,N,N'-dibutyl-
Hydrazine
Hydrochloric Acid, Anhydrous
Hydrochloric Acid Solutions (37% or greater)
Hydrocyanic acid
Hydrofluoric Acid, Anhydrous
Hydrofluoric Acid Solutions (50% or greater)
Hydrogen
Hydrogen Bromide
Hydrogen Chloride
Hydrogen Cyanide, Anhydrous
Hydrogen Fluoride/Hydrofluoric acid
Hydrogen Peroxide (52% by weight or greater)
Hydrogen Selenide
Hydrogen Sulfide
Hydroquinone
Hydroxylamine
Iron, Pentacarbonyl
Isobenzan
Isobutane
Isobutyronitrile
Isocyanic acid, 3,4-dichlorophenyl ester
Isodrin
Isofluorphate
Isopentane
Isophorone diisocyanate
Isoprene
Isopropylamine
Isopropyl chloride
Isopropyl chloroformate
Isopropylmethylpyrazolyl dimethylcarbamate
Ketene
Lactonitrile
Leptophos
Lewisite
Lindane
Lithium hydride
Malononitrile
Manganese, tricarbonyl methylcyclopentadienyl
Mechlorethamine
Mephosfolan
Mercuric acetate
Mercuric oxide
Mercuric chloride
Methacrylaldehyde
Methane
Methacrolein diacetate
Methacrylic anhydride
Methyacrylonitrile
Methacryloyl Chloride
Methacryloyloxyethyl Isocyante
Methamidophos
Methanesulfonyl fluoride
Methidathion
Methiocarb
Methomyl
Methoxyethylmercuric acetate
Methyl Acrylonitrile
Methylamine, Anhydrous
3-Methyl-1-butene
2-Methyl-1-butene
Methyl Bromide
Methyl Chloride
Methyl Chloroformate
Methyl ether
Methyl Ethyl Ketone Peroxide
Methyl ether
Methyl Fluoroacetate
Methyl Fluorosulfate
Methyl formate
Methyl Hydrazine
Methyl Iodide
Methyl Isocyanate
Methyl isothiocyanate
Methyl Mercaptan
Methyl phenkapton
Methyl phosphonic dichloride
Methyl thiocyanate
Methyl Vinyl Ketone
Methyl 2-chloroacrylate
2-Methylpropene
Methyltrichlorosilane
Methylmercuric dicyanamide
Metolcarb
Mevinphos
Mexacarbate
Mitomycin C
Monocrotophos
Muscimol
Mustard gas
Nickel Carbonyl (Nickel Tetracarbonyl)
Nicotine sulfate
Nicotine
Nitric Acid (80% or greater)
Nitric Oxide
Nitroaniline (para Nitroaniline)
Nitrobenzene
Nitrocyclohexane
Nitromethane
Nitrogen Dioxide
Nitrogen Oxides (NO; NO (2); N204; N203)
Nitrosodimethylamine
Nitrogen Tetroxide
(also called Nitrogen Peroxide)
Nitrogen Trifluoride
Nitrogen Trioxide
Norbormide
o-Cresol
Oleum (65% to 80% by weight;
also called Fuming Sulfuric Acid)
Organorhodium Complex (PMN-82-147)
Osmium Tetroxide
Ouabain
Oxamyl
Oxetane, 3,3-bis(chloromethyl)-
Oxydisulfoton
Oxygen Difluoride (Fluorine Monixide)
Ozone
Paraquat methosulfate
Paraquat dichloride
Parathion
Parathion-methyl
Paris green
Pentaborane
Pentadecylamine
1,3-Pentadiene
Pentane
1-Pentene
2-Pentene, (E)-
2-Pentene, (Z)-
Peracetic Acid (concentration greater 60%
also called Peroxyacetic Acid)
Perchloric Acid (concentration greater than
60% by weight)
Perchloromethyl Mercaptan
Perchloryl Fluoride
Peroxyacetic Acid (concentration greater than
60% Acetic Acid; also called Peracetic Acid)
Phenol
Phenol, 3-(1-methylethyl)-,methylcarbamate
Phenol, 2,2'-thiobis[4-chloro-6-methyl-
Phenoxarsine, 10,10'-oxydi-
Phenyl dichloroarsine
Phenylhydrazine hydrochloride
Phenylmercury acetate
Phenylsilatrace
Phenylthiourea
Phorate
Phosacetim
Phosfolan
Phosgene (also called Carbonyl Chloride)
Phosmet
Phosphamidon
Phosphine (Hydrogen Phosphide)
Phosphonothioic acid, methyl-, O-ethyl O-(4-(methylthio)phenyl) ester
Phosphonothioic acid, methyl-, S-(2-(bis(1-methylethyl)amino)ethyl) O-ethyl ester
Phosphonothioic acid,methyl-, O-(4-nitrophenyl) O-phenyl ester
Phosphoric acid, dimethyl 4-(methylthio) phenyl ester
Phosphorothioic acid, O,O-dimethyl-5-(2-(methylthio)ethyl)ester
Phosphorus Oxychloride (also called
Phosphoryl Chloride)
Phosphorus pentachloride
Phosphorus Trichloride
Phosphorus
Phosphoryl Chloride (also called Phosphorus
Oxychloride)
Physostigmine
Physostigmine, salicylate (1:1)
Picrotoxin
Piperidine
Pirimifos-ethyl
Potassium cyanide
Potassium arsenite
Potassium silver cyanide
Promecarb
Propadiene
Propane	1
Propargyl Bromide
Propionitrile
Propionitrile, 3-chloro-
Propiophenone, 4'-amino
Propyl chloroformate
Propyleneimine
Propylene
Propylene oxide
Propyl chloroformate
Propyl Nitrate
Propyne
Prothoate
Pyrene
Pyridine, 4-amino-
Pyridine, 2-methyl-5-vinyl-
Pyridine, 4-nitro-, 1-oxide
Pyriminil
Salcomine
Sarin
Selenious acid
Selenium Hexafluoride
Selenium oxychloride
Semicarbazide hydrochloride
Silane
Silane, Dimethyldichloro
Silane, Trimethylchloro
Silane, Trichloro
Silane, Tetramethyl
Silane, (4-aminobutyl)diethoxymethyl-
Sodium selenate
Sodium arsenite
Sodium fluorocetate
Sodium cacodylate
Sodium cyanide (Na(CN))
Sodium arsenate
Sodium selenite
Sodium azide (Na(N3))
Sodium tellurite
Stannane, acetoxytriphenyl-
Stibine (Antimony Hydride)
Strychnine
Strychnine, sulfate
Sulfotep
Sulfoxide, 3-chloropropyl octyl
Sulfur Dioxide (liquid)
Sulfur Pentafluoride
Sulfur Tetrafluoride
Sulfur Trioxide (also called Sulfuric Anhydride)
Sulfuric acid
Sulfuric Anhydride (also called Sulfur Trioxide)
Tabun
Tellurium Hexafluoride
Tepp
Terbufos
Tetraethyl lead
Tetraethyltin
Tetramethyllead
Tetrafluoroethylene
Tetrafluorohydrazine
Tetramethyl Lead
Tetramethylsilane
Tetranitromethane
Thallium sulfate
Thallous malonate
Thallous carbonate
Thallous chloride
Thallous sulfate
Thiocarbazide
Thiofanox
Thionazin
Thionyl Chloride
Thiophenol
Thiosemicarbazide
Thiourea, (2-chlorophenyl)-
Thiourea, (2-methylphenyl)-
Titanium tetrachloride
Toluene 2,4-diisocyanate
Toluene 2,6-diisocyanate
Toluene diisocyanate
Trans-1,4-Dichlorobutene
Triamiphos
Triazofos
Trichloro (chloromethyl) Silane
Trichloro (dichlorophenyl) Silane
Trichloroacetyl chloride
Trichloroethylsilane
Trichloronate
Trichlorophenylsilane
Trichlorosilane
Triethoxysilane
Trifluorochloroethylene
Trimethylamine
Trimethylchlorosilane
Trimethylolpropane phosphite
Trimethyltin chloride
Trimethyoxysilane
Triphenyltin chloride
Tris(2-chloroethyl)amine
Valinomycin
Vanadium pentoxide
Vinyl acetate monomer
Vinyl acetylene
Vinyl chloride
Vinyl ethyl ether
Vinyl fluoride
Vinylidene chloride
Vinylidene fluoride
Vinyl methyl ether
Warfarin sodium
Warfarin sodium
Xylylene dichloride
Zinc phosphide
Zinc, dichloro(4,4-dimethyl-5((((methylamino)carbonyl)oxy)imino)pentanenitrile)-,(T-4)-
References:
OSHA 29 CFR 1910.119 - Process Safety Management -
Highly Hazarous Chemicals
EPA 40 CFR 68.130 - Risk Management Planning -
Regulated Toxic Substances
EPA 40 CFR 355 - Extremely Hazardous Substances and
Their Threshold Planning Quantities

## Sheet: Greenness Score Card
		Process Greenness Score Card: Results																	Process Greenness Score Card: Results																Process Greenness Score Card: Results
	Time Point in Development:		0								Prepared by:		0						0												Prepared by:		0		0				Prepared by:		0
	Project Name:		0								Date:		00:00:00						0												Date:		00:00:00		0				Date:		00:00:00
	Project No:		0								Version:		0						0												Version:		0		0				Version:		0
		Overall	Step-1		Step-2		Step-3		Step-4		Step-5		Step-6		Step-7		Step-8		Step-9		Step-10		Step-11		Step-12		Step-13		Step-14		Step-15		Step-16		Step-17		Step-18		Step-19		Step-20
			Compound 1		Compound 2		Compound 3
	Score:	0.629788	0.657797		0.406249		0.491587				0.25
	% Completed:	0.927536	1		1		1
1	Class of Solvents Used	1.50673	1.76923	7.07692	0.0392157	0.156863	2.53012	10.1205	-1	0	0	0	-1	0	-1	0	-1	0	-1	0	-1	6.02691	-1	0	-1	0	-1	0	-1	0	-1	0	-1	0	-1	0	-1	0	-1	0	-1
2	Solvent Recovery Percentage	0	0	0	0	0	0	0	-1	0	-1	0	-1	0	-1	0	-1	0	-1	0	-1	0	-1	0	-1	0	-1	0	-1	0	-1	0	-1	0	-1	0	-1	0	-1	0	-1
3	Liquid Process Waste kg/kg	0.430488	1.4867	5.9468	-0.147574	-0.590297	-1.11506	-4.46022	-1	0	-1	0	-1	0	-1	0	-1	0	-1	0	-1	1.72195	-1	0	-1	0	-1	0	-1	0	-1	0	-1	0	-1	0	-1	0	-1	0	-1
4	Solid Process Waste kg/kg	4	4	4	4	4	4	4	-1	0	-1	0	-1	0	-1	0	-1	0	-1	0	-1	4	-1	0	-1	0	-1	0	-1	0	-1	0	-1	0	-1	0	-1	0	-1	0	-1
5	Number of Unique Solvents Used	2.425	4	4	1	1	4	4	-1	0	-1	0	-1	0	-1	0	-1	0	-1	0	-1	2.425	-1	0	-1	0	-1	0	-1	0	-1	0	-1	0	-1	0	-1	0	-1	0	-1
6	Gaseous/Highly Volatile Byproducts/Excess Reagent Gases - Chose lowest number item from drop down menu	3.33333	4	4	3	3	4	4	-1	0	-1	0	-1	0	-1	0	-1	0	-1	0	-1	3.33333	-1	0	-1	0	-1	0	-1	0	-1	0	-1	0	-1	0	-1	0	-1	0	-1
7	Number of Chemical Transformations	3.33333	4	2	4	2	2	1	-1	0	-1	0	-1	0	-1	0	-1	0	-1	0	-1	1.66667	-1	0	-1	0	-1	0	-1	0	-1	0	-1	0	-1	0	-1	0	-1	0	-1
8	Number of Isolations	4	4	4	4	4	3	3	-1	0	-1	0	-1	0	-1	0	-1	0	-1	0	-1	4	-1	0	-1	0	-1	0	-1	0	-1	0	-1	0	-1	0	-1	0	-1	0	-1
9	Step Yield (Molar %)	2.53333	2.8	5.6	2.8	5.6	2	4	-1	0	-1	0	-1	0	-1	0	-1	0	-1	0	-1	7.6	-1	0	-1	0	-1	0	-1	0	-1	0	-1	0	-1	0	-1	0	-1	0	-1
10	Number of Hazardous Reagents Used	3	3	3	4	4	4	4	-1	4	-1	4	-1	4	-1	4	-1	4	-1	4	-1	3	-1	0	-1	0	-1	0	-1	0	-1	0	-1	0	-1	0	-1	0	-1	0	-1
11	Dust Explosion Potential	0.666667	2	1	2.66667	1.33333	1.33333	0.666667	-1	0	-1	0	-1	0	-1	0	-1	0	-1	0	-1	0.333333	-1	0	-1	0	-1	0	-1	0	-1	0	-1	0	-1	0	-1	0	-1	0	-1
	Charge Dissipation - Chose from drop down menu	1	3	0	2	0	1	0	-1	0	-1	0	-1	0	-1	0	-1	0	-1	0	-1	0	-1	0	-1	0	-1	0	-1	0	-1	0	-1	0	-1	0	-1	0	-1	0	-1
	Pressure rise rate (bar/sec)	0	0	0	0	0	2	0	-1	0	-1	0	-1	0	-1	0	-1	0	-1	0	-1	0	-1	0	-1	0	-1	0	-1	0	-1	0	-1	0	-1	0	-1	0	-1	0	-1
	Minimum Ignition Energy (millijoules)	0	0	0	4	0	0	0	-1	0	-1	0	-1	0	-1	0	-1	0	-1	0	-1	0	-1	0	-1	0	-1	0	-1	0	-1	0	-1	0	-1	0	-1	0	-1	0	-1
	Kst Explosion Energy value (ST)	1	2	0	1	0	1	0	-1	0	-1	0	-1	0	-1	0	-1	0	-1	0	-1	0	-1	0	-1	0	-1	0	-1	0	-1	0	-1	0	-1	0	-1	0	-1	0	-1
12	Process Hazards - Choose from drop down menu	3.33333	4	4	3	3	4	4	-1	0	-1	0	-1	0	-1	0	-1	0	-1	0	-1	3.33333	-1	0	-1	0	-1	0	-1	0	-1	0	-1	0	-1	0	-1	0	-1	0	-1
13	Environmental Issues/Biopersistent Materials - Choose Lowest number item from drop down menu	4	4	4	4	4	4	4	-1	0	-1	0	-1	0	-1	0	-1	0	-1	0	-1	4	-1	0	-1	0	-1	0	-1	0	-1	0	-1	0	-1	0	-1	0	-1	0	-1
14	Worker Exposure Issues	1.5	4	4	1	1	1	1	-1	0	-1	0	-1	0	-1	0	-1	0	-1	0	-1	1.5	-1	0	-1	0	-1	0	-1	0	-1	0	-1	0	-1	0	-1	0	-1	0	-1
15	Intermediates (kg/kg API)	4
16	Number of Steps	3.66667
17	Average Yield	0
	PMI
	Process Mass Intensity		35.7933		77.9438		123.556
	PMI Substrate, Reagents, Solvents		33.9095		77.9438		72.6799
	PMI Substrates and Reagents		3.13977		2.94127		2.9072
	PMI Solvents		30.7697		75.0025		69.7727
	PMI Water		1.88386		0		50.8759
	PMI / kg API	313.4	76.5		113.3		123.6
	PMI Substrate, Reagents, Solvents/kg API	258.5	72.5		113.3		72.7
	PMI Substrates and Reagents/kg API	13.9	6.7		4.3		2.9
	PMI Solvents/kg API	244.6	65.8		109		69.8
	PMI Water/kg API	54.9	4		0		50.9
				High
				Medium
				Low
	RATINGS: 0(Bad) => 4(Good) }
	Areas of Improvements
	0-1	High
	2-3	Medium
	3-4	Low
		No Input

## Sheet: Overall Process Greenness
Process Greenness Score Card: Overall Score
Time Point in Development:	0			Prepared by:	0
Project Name:	0			Date:	00:00:00
Project No:	0			Version:	0
		Results:
				Override Value
	1	Class of Solvents Used	1.50673
		Calculated Value:
		Acetone, tert-Amyl methyl ether (TAME), Anisole, 1-Butanol, tert-Butanol, n-Butyl acetate, Dimethyl carbonate, Ethanol, Ethyl acetate, Ethylene glycol, Isoamyl alcohol, Isobutanol, Isobutyl acetate, Isopropanol, Isopropyl acetate, Methanol, Methyl ethyl ketone, Methyl isobutyl ketone, Water	0.155597
		Acetic acid, Acetic anhydride, Acetonitrile, Benzyl alcohol, Chlorobenzene, Cyclohexane, Cyclohexanone, CPME, DMPU, DMSO, Formic acid, n-Heptane, Methyl acetate, Methylcyclohexane, 2-MeTHF, 1,3-Propanediol, Propylene carbonate, THF, Toluene, Xylenes	0.442171
		MTBE, DCM, Diisopropyl ether, DME, DMAc, DMF, 1,4-Dioxane, n-Hexane, n-Pentane, 2-Methoxyethanol, NMP, Pyridine, Sulfolane, Triethylamine	0.402233
		Benzene, Carbon tetrachloride, Chloroform, DCE, Diethyl ether, HMPA, Nitromethane	0
	2	Solvent Recovery Percentage	0
		Calculated Value:	0
	3	Liquid Process Waste kg/kg API	0.430488
		Summation of Values:	313.371
	4	Solid Process Waste kg/kg API	4
	5	Number of Unique Solvents Used	2.425
	6	Gaseous/Highly Volatile Byproducts/Excess Reagent Gases	3.33333
	7	Chemical Transformations/Process Transformations	3.33333
		Summation of Values:	7
	8	Number of Isolations	4
		Summation of Values:	4
	15	Intermediates (kg/kg API)	4
		Calculated Value:	3.59131
	16	Number of Steps	3.66667
		Total Numebr of Steps	3
	9	Average Yield M%	2.53333
		Average Value:	0.816667
	10	Number of Hazardous Reagents Used	3
		Summation of Values:	1
	Avg(Min + Avg Value from All Steps):
	11	Dust Explosion Potential	0.666667
		Charge Dissipation	-1
		Pressure rise rate (bar/sec)	0
		Minimum Ignition Energy (millijoules)	0
		Kst Explosion Energy value (ST)	1
	12	Process Hazards	3.33333
	13	Environmental Issues/Biopersistent Materials	4
	14	Worker Exposure Issues	1.5
		Calculated Value:	0.541875
		Score:	0.629788
		PMI / kg API	313.4
		PMI Substrate, Reagents, Solvents/kg API	258.5
		PMI Substrates and Reagents/kg API	13.9
		PMI Solvents/kg API	244.6
		PMI Water/kg API	54.9
		Avg Step Process Mass Intensity	79.0976
		Avg Step PMI Substrate, Reagents, Solvents	61.511
		Avg Step PMI Substrates and Reagents	2.99608
		Avg Step PMI Solvents	58.515
		Avg Step PMI Water	17.5866
		Avg Step PMI / kg API	104.467
		Avg Step PMI Substrate, Reagents, Solvents/kg API	86.1667
		Avg Step PMI Substrates and Reagents/kg API	4.63333
		Avg Step PMI Solvents/kg API	81.5333
		Avg Step PMI Water/kg API	18.3
		Average PRD Greenness Score	0.601877
		% Complete:	0.927536

## Sheet: Drop Down List
	Gaseous/Highly Volatile By-products/Excess Reagent Gases	Score	Display
	None	4	4 - None
	Carbon Dioxide	4	4 - Carbon Dioxide
	Nitrogen	4	4 - Nitrogen
	Butane	4	4 - Butane
	Isobutylene	3	3 - Isobutylene
	Ethylene	3	3 - Ethylene
	Sulfur Oxides	2	2 - Sulfur Oxides
	Nitrogen Oxides	2	2 - Nitrogen Oxides
	Carbon Monoxide	1	1 - Carbon Monoxide
	Hydrogen	1	1 - Hydrogen
	Oxygen	1	1 - Oxygen
	Ammonia	1	1 - Ammonia
	HCl	1	1 - HCl
	HBr	1	1 - HBr
	HI	1	1 - HI
	Methyl Halide	1	1 - Methyl Halide
	Methyl Mercaptan	0	0 - Methyl Mercaptan
	Hydrogen Sulfide	0	0 - Hydrogen Sulfide
	Hydrozoic Acid	0	0 - Hydrozoic Acid
	HCN	0	0 - HCN
	Chloramine	0	0 - Chloramine
	Charge Dissipation
	< 1 millisec	4
	1 millisec to 1 sec	3
	1 sec to 1 min	2
	1 min to 5 min	1
	> 5 min	0
	Unknown	0
	Process Hazards
	Inherently Safe Process (≤10 °C T adiabatic, no gas generation)	4
	Moderate heat (>10 °C to ≤50 °C T adiabatic) OR gas generation-easy to manage.	3
	Moderate heat (>10 °C to ≤50 °C T adiabatic) AND gas generation-can manage.	2
	High heat (>50 °C T adiabatic) and/or high gas evolution.	1
	Runaway potential. Sensitive fire or explosion hazards. (e.g. sodium azide, pyrophorics)	0
	Unknown
	Environmental Issues/Biopersistent Materials
	None	4	4 - None
	Sodium	4	4 - Sodium
	Potassium	4	4 - Potassium
	Calcium	4	4 - Calcium
	Magnesium	4	4 - Magnesium
	Silica	3	3 - Silica
	Activated Carbon	3	3 - Activated Carbon
	Halogens	3	3 - Halogens
	Sulfur	3	3 - Sulfur
	Phosphorus	3	3 - Phosphorus
	Lithium	2	2 - Lithium
	Iron	2	2 - Iron
	Palladium	2	2 - Palladium
	Platinum	2	2 - Platinum
	Copper	1	1 - Copper
	Tin	1	1 - Tin
	Zinc	1	1 - Zinc
	Cerium	1	1 - Cerium
	Arsenic	0	0 - Arsenic
	Mercury	0	0 - Mercury
	Lead	0	0 - Lead
	Chromium	0	0 - Chromium
	Nickel	0	0 - Nickel
	Cadmium	0	0 - Cadmium
	Unknown	0	0 - Unknown
	Exposure Issues:
	≥ 100 ug/m3
	10-100 ug/m3
	1-10 ug/m3
	0.1-1 ug/m3
	<0.1 ug/m3
	Unknown
	Section Name
	Last Step
	Compound 1
	Compound 2
	Compound 3
	0
	0
	0
	0
	0
	0
	0
	0
	0
	0
	0
	0
	0
	0
	0
	0
	0
	Dust Hazards:
	Pressure rise rate
	0 bar/sec	4
	<50 bar/sec	3
	50 to 200 bar/sec	2
	200 to 500 bar/sec	1
	> 500 bar/sec	0
	Min igition temp
	>500 millijoules	4
	500 to 50 millijoules	3
	50 to 25 millijoules	2
	25 to 10 millijoules	1
	<10 millijoules	0
	Kst Explosion Energy
	0 (St 0)	4
	<200 (St 1)	2
	201-300 (St 2)	1
	> 300 (St 3)	0

## Sheet: Step Calcs
			Step 1		Step 2		Step 3		Step 4		Step 5		Step 6		Step 7		Step 8		Step 9		Step 10		Step 11		Step 12		Step 13		Step 14		Step 15		Step 16		Step 17		Step 18		Step 19		Step 20		Overall
	Process Greenness Rating			0.657797		0.406249		0.491587				0.25																																0.629788
	Percent Completed:			1		1		1		0		0.2		0		0		0		0		0		0		0		0		0		0		0		0		0		0		0		0.927536
	Total Points:	20																																										23
	Parameters	Weight Factor	Input Score	Weighted Score	Input Score	Weighted Score	Input Score	Weighted Score	Input Score	Weighted Score	Input Score	Weighted Score	Input Score	Weighted Score	Input Score	Weighted Score	Input Score	Weighted Score	Input Score	Weighted Score	Input Score	Weighted Score	Input Score	Weighted Score	Input Score	Weighted Score	Input Score	Weighted Score	Input Score	Weighted Score	Input Score	Weighted Score	Input Score	Weighted Score	Input Score	Weighted Score	Input Score	Weighted Score	Input Score	Weighted Score	Input Score	Weighted Score	Input Score	Weighted Score	Overall Weight
1	Class of Solvents Used	4	1.76923	7.07692	0.0392157	0.156863	2.53012	10.1205	0	0	0	0	0	0	0	0	0	0	0	0	0	0	0	0	0	0	0	0	0	0	0	0	0	0	0	0	0	0	0	0	0	0	1.50673	6.02691	4	16
2	Solvent Recovery Percentage	1	0	0	0	0	0	0	0	0	0	0	0	0	0	0	0	0	0	0	0	0	0	0	0	0	0	0	0	0	0	0	0	0	0	0	0	0	0	0	0	0	0	0	1	4
3	Process Waste (Liquid) L/kg	4	1.4867	5.9468	-0.147574	-0.590297	-1.11506	-4.46022	0	0	0	0	0	0	0	0	0	0	0	0	0	0	0	0	0	0	0	0	0	0	0	0	0	0	0	0	0	0	0	0	0	0	0.430488	1.72195	4	16
4	Process Waste (Solid) kg/kg	1	4	4	4	4	4	4	0	0	0	0	0	0	0	0	0	0	0	0	0	0	0	0	0	0	0	0	0	0	0	0	0	0	0	0	0	0	0	0	0	0	4	4	1	4
5	Number of Unique Solvents Used	1	4	4	1	1	4	4	0	0	0	0	0	0	0	0	0	0	0	0	0	0	0	0	0	0	0	0	0	0	0	0	0	0	0	0	0	0	0	0	0	0	2.425	2.425	1	4
6	Gaseous/Highly Volatile Byproducts/Excess Reagent Gases	1	4	4	3	3	4	4	0	0	0	0	0	0	0	0	0	0	0	0	0	0	0	0	0	0	0	0	0	0	0	0	0	0	0	0	0	0	0	0	0	0	3.33333	3.33333	1	4
7	Chemical Transformations/Process Transformations	0.5	4	2	4	2	2	1	0	0	0	0	0	0	0	0	0	0	0	0	0	0	0	0	0	0	0	0	0	0	0	0	0	0	0	0	0	0	0	0	0	0	3.33333	1.66667	0.5	2
8	Number of Isolations	1	4	4	4	4	3	3	0	0	0	0	0	0	0	0	0	0	0	0	0	0	0	0	0	0	0	0	0	0	0	0	0	0	0	0	0	0	0	0	0	0	4	4	1	4
9	Step Yield M%	2	2.8	5.6	2.8	5.6	2	4	0	0	0	0	0	0	0	0	0	0	0	0	0	0	0	0	0	0	0	0	0	0	0	0	0	0	0	0	0	0	0	0	0	0	2.53333	7.6	3	12
10	Number of Hazardous Reagents Used	1	3	3	4	4	4	4	4	4	4	4	4	4	4	4	4	4	4	4	4	4	4	4	4	4	4	4	4	4	4	4	4	4	4	4	4	4	4	4	4	4	3	3	1	4
11	Dust Explosion Potential	0.5	2	1	2.66667	1.33333	1.33333	0.666667	0	0	0	0	0	0	0	0	0	0	0	0	0	0	0	0	0	0	0	0	0	0	0	0	0	0	0	0	0	0	0	0	0	0	0.666667	0.333333	0.5	2
	Charge Dissipation		3		2		1		4		4		4		4		4		4		4		4		4		4		4		4		4		4		4		4		4		1			0
	Pressure rise rate (bar/sec)		0		0		2		4		4		4		4		4		4		4		4		4		4		4		4		4		4		4		4		4		0			0
	Minimum Ignition Energy (millijoules)		0		4		0		4		4		4		4		4		4		4		4		4		4		4		4		4		4		4		4		4		0			0
	Kst Explosion Energy (ST)		2		1		1		4		4		4		4		4		4		4		4		4		4		4		4		4		4		4		4		4		1			0
12	Process Hazards	1	4	4	3	3	4	4	0	0	0	0	0	0	0	0	0	0	0	0	0	0	0	0	0	0	0	0	0	0	0	0	0	0	0	0	0	0	0	0	0	0	3.33333	3.33333	1	4
13	Environmental Issues/Biopersistent Materials	1	4	4	4	4	4	4	0	0	0	0	0	0	0	0	0	0	0	0	0	0	0	0	0	0	0	0	0	0	0	0	0	0	0	0	0	0	0	0	0	0	4	4	1	4
14	Worker Exposure Issues	1	4	4	1	1	1	1	0	0	0	0	0	0	0	0	0	0	0	0	0	0	0	0	0	0	0	0	0	0	0	0	0	0	0	0	0	0	0	0	0	0	1.5	1.5	1	4
15	Intermediates kg/kg API	1																																									4	4	1	4
16	Number of Steps	2																																									3.66667	11	3	12
17
	Average PMI/step
	Calcualtions
1	Solvent Calculations:																																														Overall Solvent Usage
	Class:	Weighted Value	%	score	%	score	%	score	%	score	%	score	%	score	%	score	%	score	%	score	%	score	%	score	%	score	%	score	%	score	%	score	%	score	%	score	%	score	%	score	%	score	%	score			1		2
	4	4	0.0769231	0.307692	0	0	0.421687	1.68675	0	0	0	0	0	0	0	0	0	0	0	0	0	0	0	0	0	0	0	0	0	0	0	0	0	0	0	0	0	0	0	0	0	0	0.155597	0.622387			6.41314		0
	3	2	0.730769	1.46154	0.0196078	0.0392157	0.421687	0.843373	0	0	0	0	0	0	0	0	0	0	0	0	0	0	0	0	0	0	0	0	0	0	0	0	0	0	0	0	0	0	0	0	0	0	0.442171	0.884341			81.2332		1.4536
	2	0	0.192308	0	0.980392	0	0.156627	0	0	0	0	0	0	0	0	0	0	0	0	0	0	0	0	0	0	0	0	0	0	0	0	0	0	0	0	0	0	0	0	0	0	0	0.402233	0			21.3771		72.6799
	1	-2	0	0	0	0	0	0	0	0	0	0	0	0	0	0	0	0	0	0	0	0	0	0	0	0	0	0	0	0	0	0	0	0	0	0	0	0	0	0	0	0	0	0			0		0
	Total:			1.76923		0.0392157		2.53012		0		0		0		0		0		0		0		0		0		0		0		0		0		0		0		0		0		1.50673
2	Solvent Recovery Percentage		0	0	0	0	0	0	0	0	0	0	0	0	0	0	0	0	0	0	0	0	0	0	0	0	0	0	0	0	0	0	0	0	0	0	0	0	0	0	0	0	0	0			0		0
3	Process Waste (Liquid) kg/kg		35.7933	1.4867	77.9438	-0.147574	123.556	-1.11506	0	0	0	0	0	0	0	0	0	0	0	0	0	0	0	0	0	0	0	0	0	0	0	0	0	0	0	0	0	0	0	0	0	0	313.371	0.430488			76.516		113.299
4	Process Waste (Solid) kg/kg		0	4	0	4	0	4	0	0	0	0	0	0	0	0	0	0	0	0	0	0	0	0	0	0	0	0	0	0	0	0	0	0	0	0	0	0	0	0	0	0	0	4	min	avg	0		0
5	Number of Unique Solvents		1	4	4	1	1	4	0	0	0	0	0	0	0	0	0	0	0	0	0	0	0	0	0	0	0	0	0	0	0	0	0	0	0	0	0	0	0	0	0	0		2.425	1	3.85	2.13771		5.81439
6	Gaseous/Highly Volatile Byproducts/Excess Reagent Gases		4 - None	4	3 - Ethylene	3	4 - None	4	0		0		0		0		0		0		0		0		0		0		0		0		0		0		0		0		0			3.33333	3	3.66667
7	Chemical Transformations		2	4	1	4	4	2	0	0	0	0	0	0	0	0	0	0	0	0	0	0	0	0	0	0	0	0	0	0	0	0	0	0	0	0	0	0	0	0	0	0	7	3.33333			2		1
8	Number of Isolations		1	4	1	4	2	3	0	0	0	0	0	0	0	0	0	0	0	0	0	0	0	0	0	0	0	0	0	0	0	0	0	0	0	0	0	0	0	0	0	0	4	4			1		1
9	Step Yield (Molar %)		0.85	2.8	0.85	2.8	0.75	2	0	0	0	0	0	0	0	0	0	0	0	0	0	0	0	0	0	0	0	0	0	0	0	0	0	0	0	0	0	0	0	0	0	0	0.816667	2.53333
10	Number of Hazardous Reagents Used		1	3	0	4	0	4	0	4	0	4	0	4	0	4	0	4	0	4	0	4	0	4	0	4	0	4	0	4	0	4	0	4	0	4	0	4	0	4	0	4	1	3
11	Dust Explosion Potential
	Charge Dissipation		1 millisec to 1 sec	3	1 sec to 1 min	2	1 min to 5 min	1	0	4	0	4	0	4	0	4	0	4	0	4	0	4	0	4	0	4	0	4	0	4	0	4	0	4	0	4	0	4	0	4	0	4		1
	Pressure rise rate (bar/sec)		200 to 500 bar/sec	0	> 500 bar/sec	0	50 to 200 bar/sec	2	0	4	0	4	0	4	0	4	0	4	0	4	0	4	0	4	0	4	0	4	0	4	0	4	0	4	0	4	0	4	0	4	0	4		0
	Minimum Ignition Energy (millijoules)		<10 millijoules	0	>500 millijoules	4	<10 millijoules	0	0	4	0	4	0	4	0	4	0	4	0	4	0	4	0	4	0	4	0	4	0	4	0	4	0	4	0	4	0	4	0	4	0	4		0
	Kst Explosion Energy value (ST)		<200 (St 1)	2	201-300 (St 2)	1	201-300 (St 2)	1	0	4	0	4	0	4	0	4	0	4	0	4	0	4	0	4	0	4	0	4	0	4	0	4	0	4	0	4	0	4	0	4	0	4		1	min	avg
12	Process Hazards		Inherently Safe Process (≤10 °C T adiabatic, no gas generation)	4	Moderate heat (>10 °C to ≤50 °C T adiabatic) OR gas generation-easy to manage.	3	Inherently Safe Process (≤10 °C T adiabatic, no gas generation)	4	0		0		0		0		0		0		0		0		0		0		0		0		0		0		0		0		0			3.33333	3	3.66667
13	Environmental Issues/Biopersistent Materials		4 - Calcium	4	4 - Magnesium	4	4 - None	4	0		0		0		0		0		0		0		0		0		0		0		0		0		0		0		0		0			4	4	4
14	Worker Exposure Issues		≥ 100 ug/m3	4	0.1-1 ug/m3	1	0.1-1 ug/m3	1	0		0		0		0		0		0		0		0		0		0		0		0		0		0		0		0		0			1.5	1	2
																																											3.59131	4
																																											3	3.66667
	Completion Matrix																																										0.541875	3.07734		Calculated Yield	0.541875
	1		1	4	1	4	1	4	0	0	1	4	0	0	0	0	0	0	0	0	0	0	0	0	0	0	0	0	0	0	0	0	0	0	0	0	0	0	0	0	0	0	4	64
	2		1	1	1	1	1	1	0	0	0	0	0	0	0	0	0	0	0	0	0	0	0	0	0	0	0	0	0	0	0	0	0	0	0	0	0	0	0	0	0	0	3	3
	3		1	4	1	4	1	4	0	0	0	0	0	0	0	0	0	0	0	0	0	0	0	0	0	0	0	0	0	0	0	0	0	0	0	0	0	0	0	0	0	0	3
	4		1	1	1	1	1	1	0	0	0	0	0	0	0	0	0	0	0	0	0	0	0	0	0	0	0	0	0	0	0	0	0	0	0	0	0	0	0	0	0	0	3
	5		1	1	1	1	1	1	0	0	0	0	0	0	0	0	0	0	0	0	0	0	0	0	0	0	0	0	0	0	0	0	0	0	0	0	0	0	0	0	0	0	3
	6		1	1	1	1	1	1	0	0	0	0	0	0	0	0	0	0	0	0	0	0	0	0	0	0	0	0	0	0	0	0	0	0	0	0	0	0	0	0	0	0	3
	7		1	0.5	1	0.5	1	0.5	0	0	0	0	0	0	0	0	0	0	0	0	0	0	0	0	0	0	0	0	0	0	0	0	0	0	0	0	0	0	0	0	0	0	3
	8		1	1	1	1	1	1	0	0	0	0	0	0	0	0	0	0	0	0	0	0	0	0	0	0	0	0	0	0	0	0	0	0	0	0	0	0	0	0	0	0	3
	9		1	2	1	2	1	2	0	0	0	0	0	0	0	0	0	0	0	0	0	0	0	0	0	0	0	0	0	0	0	0	0	0	0	0	0	0	0	0	0	0	3
	10		1	1	1	1	1	1	0	0	0	0	0	0	0	0	0	0	0	0	0	0	0	0	0	0	0	0	0	0	0	0	0	0	0	0	0	0	0	0	0	0	3
	11		1	0.5	1	0.5	1	0.5	0	0	0	0	0	0	0	0	0	0	0	0	0	0	0	0	0	0	0	0	0	0	0	0	0	0	0	0	0	0	0	0	0	0	3
	12		1	1	1	1	1	1	0	0	0	0	0	0	0	0	0	0	0	0	0	0	0	0	0	0	0	0	0	0	0	0	0	0	0	0	0	0	0	0	0	0	3
	13		1	1	1	1	1	1	0	0	0	0	0	0	0	0	0	0	0	0	0	0	0	0	0	0	0	0	0	0	0	0	0	0	0	0	0	0	0	0	0	0	3
	14		1	1	1	1	1	1	0	0	0	0	0	0	0	0	0	0	0	0	0	0	0	0	0	0	0	0	0	0	0	0	0	0	0	0	0	0	0	0	0	0	3
	Possible Score:			20		20		20		0		4		0		0		0		0		0		0		0		0		0		0		0		0		0		0		0
	Dust calcs complete:
	Charge Dissipation - Chose from drop down menu		1		1		1		0		0		0		0		0		0		0		0		0		0		0		0		0		0		0		0		0		3
	Pressure rise rate (bar/sec)		1		1		1		0		0		0		0		0		0		0		0		0		0		0		0		0		0		0		0		0		3
	Minimum Ignition Energy (millijoules)		1		1		1		0		0		0		0		0		0		0		0		0		0		0		0		0		0		0		0		0		3
	Kst Explosion Energy value (ST)		1		1		1		0		0		0		0		0		0		0		0		0		0		0		0		0		0		0		0		0		3
	Step Score Matrix:						Overall Score Matrix:
	Ranges:	4	3	2	1		Overall Score Matrix:	4	3	2	1
	Solvent Recovery Percentage	0.9	0.75	0.6	0.3		Ranges:	0.9	0.75	0.6	0.3
	Process Waste (Liquid) kg/kg	10	20	30	50		Solvent Recovery Percentage	50	100	150	250
	Process Waste (Solid) kg/kg	1	2	3	5		Process Waste (Liquid) kg/kg	5	10	15	25
	Number of Unique Solvents	1	2	3	4		Process Waste (Solid) kg/kg	0.3	1.5	4	6
	Gaseous/Highly Volatile Byproducts/Excess Reagent Gases
	Chemical Transformations	2	3	4	5			5	8	11	14
	Number of Isolations	1	2	3	4		Chemical Transformations	5	7	9	11
	Step Yield (Molar %)						Number of Isolations
	Number of Hazardous Reagents Used	0	1	2	3			0	1	2	3
	Dust Explosion Potential						Number of Hazardous Reagents Used	10	25	50	100
	Charge Dissipation	< 1 millisec	1 millisec to 1 sec	1 sec to 1 min	1 min to 5 min		Int kg/kg API	2	5	8	11
	Pressure rise rate (bar/sec)	0 bar/sec	<50 bar/sec	50 to 200 bar/sec	500		# of Steps	0.9	0.75	0.6	0.3
	Minimum Ignition Energy (millijoules)	>500 millijoules	500 to 50 millijoules	50 to 25 millijoules	10		overall
	Kst Explosion Energy value (ST)	0 (St 0)	<200 (St 1)	201-300 (St 2)	300
	Process Hazards	Inherently Safe Process (≤10 °C T adiabatic, no gas generation)	Moderate heat (>10 °C to ≤50 °C T adiabatic) OR gas generation-easy to manage.	Moderate heat (>10 °C to ≤50 °C T adiabatic) AND gas generation-can manage.	High heat and/or gas evolution.
	Environmental Issues/Biopersistent Materials
	Worker Exposure Issues	≥ 100 ug/m3	10-100 ug/m3	1-10 ug/m3	0.1-1 ug/m3
	Overall material usage
	API Column		0	0	0		8	0	0	0	0	0	0	0	0	0	0	0	0	0	0	0	0	0	0	0	0	0	0	0	0	0	0	0	0	0	0	0	0	0	0	0	8	:API Column
	API kg:	54990
	API MW	549.9
	Step		Compound 1		Compound 2		Compound 3		0		0		0		0		0		0		0		0		0		0		0		0		0		0		0		0		0
	Next Step		Compound 2		Compound 3		Last Step		0		0		0		0		0		0		0		0		0		0		0		0		0		0		0		0		0
	Equivalents		1		1		1		0		0		0		0		0		0		0		0		0		0		0		0		0		0		0		0		0
	Yield		0.85		0.85		0.75		0		0		0		0		0		0		0		0		0		0		0		0		0		0		0		0		0
	Moles		156.863		133.333		100		0		0		0		0		0		0		0		0		0		0		0		0		0		0		0		0		0
	Output MW		749.4		599.5		549.9		0		0		0		0		0		0		0		0		0		0		0		0		0		0		0		0		0
	Output Kg:		117553		79933.3		54990		0		0		0		0		0		0		0		0		0		0		0		0		0		0		0		0		0
	kg output/ kg API		2.13771		1.4536		1		0		0		0		0		0		0		0		0		0		0		0		0		0		0		0		0		0
	kg output/kg input		1.59247		0.679977		0.687948
	Solvents		49		51		48		0		0		0		0		0		0		0		0		0		0		0		0		0		0		0		0		0
	Substrates & Reagents		5		2		2		0		0		0		0		0		0		0		0		0		0		0		0		0		0		0		0		0
	Water		3		0		35		0		0		0		0		0		0		0		0		0		0		0		0		0		0		0		0		0
	Step Process Mass Intensity		35.7933		77.9438		123.556																																				237.293
	Step PMI Substrate, Reagents, Solvents		33.9095		77.9438		72.6799																																				184.533
	Step PMI Substrates and Reagents		3.13977		2.94127		2.9072																																				8.98824
	Step PMI Solvents		30.7697		75.0025		69.7727																																				175.545
	Step PMI Water		1.88386		0		50.8759																																				52.7598
	Step PMI / kg API		76.5		113.3		123.6																																				313.4
	Step PMI Substrate, Reagents, Solvents/kg API		72.5		113.3		72.7																																				258.5
	Step PMI Substrates and Reagents/kg API		6.7		4.3		2.9																																				13.9
	Step PMI Solvents/kg API		65.8		109		69.8																																				244.6
	Step PMI Water/kg API		4		0		50.9																																				54.9
	Averages
	# of steps:	3
	Avg Step Process Mass Intensity	79.0976
	Avg Step PMI Substrate, Reagents, Solvents	61.511
	Avg Step PMI Substrates and Reagents	2.99608
	Avg Step PMI Solvents	58.515
	Avg Step PMI Water	17.5866
	Avg Step PMI / kg API	104.467
	Avg Step PMI Substrate, Reagents, Solvents/kg API	86.1667
	Avg Step PMI Substrates and Reagents/kg API	4.63333
	Avg Step PMI Solvents/kg API	81.5333
	Avg Step PMI Water/kg API	18.3
	Average Solvent Usge	79.0976
	Average Greenness Score	0.601877
